# Supplementary material for: Genome-wide association analysis reveal the genetic reasons affect melanin spot accumulation in beak skin of ducks
Source: Research Square preprint supplement (doi:10.21203/rs.3.rs-608516/v1), 2021-06-25
Supplement: Supplementary file 1 [file 381fafc559d32eca61f72230.docx]

**Supplementary files**

**Genome-wide association analysis reveal the genetic reasons affect melanin spot accumulation in beak skin of ducks**

Hehe Liu1,2, Jianmei Wang2, Jian Hu1, Lei Wang2, Zhanbao Guo1, Wenlei Fan1, Yaxi Xu1, Dapeng Liu1, Yunsheng Zhang1, Ming Xie1, Jing Tang1, Wei Huang1, Qi Zhang1, Zhengkui Zhou1, Shuisheng Hou1

**Affiliations**

1State Key Laboratory of Animal Nutrition; Key Laboratory of Animal (Poultry) Genetics Breeding and Reproduction, Ministry of Agriculture and Rural Affairs; Institute of Animal Science, Chinese Academy of Agricultural Sciences, Beijing 100193, China

2Farm Animal Genetic Resources Exploration and Innovation Key Laboratory of Sichuan Province, College of Animal Science and Technology, Sichuan Agricultural University, Chengdu 613000, China

**Short title**

Genetics’ reason affects melanin deposition in duck beak skin

To whom correspondence should be addressed.

**#Corresponding Author:** Shuisheng Hou (houss@263.net)

**Work Telephone Numbers：**010-62816009

**Supplementary files**

**Figure S1.** The gene expressions of candidate genes associated with melanin spot deposition in Chr13. The global gene expression dataset in duck beak skin was from transcriptome data. Therefore, the gene names marked in red represent the average CPM value of this gene is more than 1.

**Figure S2.** The gene expressions of candidate genes associated with melanin spot deposition in Chr25. The global gene expression dataset in duck beak skin was from transcriptome data. Therefore, the gene names marked in red represent the average CPM value of this gene is more than 1.

**Table S1.** The information of significant SNPs in Chr13 associated with melanin spot deposition.

**Table S2.** The information of significant SNPs in Chr25 associated with melanin spot deposition.

**Table S3.** The POU transcription factors were predicted within the promoter region of duck MITF.
