# Supplementary material for: Genome-wide association analysis reveal the genetic reasons affect melanin spot accumulation in beak skin of ducks
Source: Research Square preprint supplement (doi:10.21203/rs.3.rs-608516/v1), 2021-06-25
Supplement: Supplementary file 2 [file 459524d9a61ff90a545be0a9.xlsx]

## Sheet: Sheet1
Factor name	Start position	End position		Dissimilarity	String	RE equally	RE query
POU1F1a [T00691]	294	298	1	0	ATTTA	9.7793	9.56788
POU2F1 [T00643]	749	754	4	0	AATGAG	3.66724	3.5862
POU1F1a [T00691]	761	765	1	0	ATTCA	9.7793	9.56788
POU1F1a [T00691]	779	783	1	0	ATTCA	9.7793	9.56788
POU1F1a [T00691]	935	939	1	0	ATTCA	9.7793	9.56788
POU2F1 [T01031]	1000	1007	4	0	ATGCAAAT	0.2292	0.22127
POU2F2B [T00662]	1000	1007	5	0	ATGCAAAT	0.0764	0.0728
POU2F2B [T01871]	1000	1007	5	0	ATGCAAAT	0.0764	0.0728
POU1F1a [T00691]	1297	1301	1	0	TAAAT	9.7793	9.56788
POU1F1a [T00691]	1425	1429	1	0	TAAAT	9.7793	9.56788
POU1F1a [T00691]	1541	1545	1	0	TGAAT	9.7793	9.56788
POU1F1a [T00691]	1544	1548	1	0	ATTTA	9.7793	9.56788
POU1F1a [T00691]	1567	1571	1	0	ATTCA	9.7793	9.56788
POU2F1 [T00643]	1784	1789	4	0	AATGAG	3.66724	3.5862
POU1F1a [T00691]	1852	1856	1	0	ATTTA	9.7793	9.56788
POU2F1 [T01031]	1931	1938	4	0	ATTTTCAT	0.2292	0.22127
POU1F1a [T00691]	1986	1990	1	0	TAAAT	9.7793	9.56788
POU1F1a [T00691]	2016	2020	1	0	TAAAT	9.7793	9.56788
POU1F1b [T01516]	2019	2026	2	0	ATAATTTT	0.2292	0.22146
POU1F1c [T01902]	2019	2026	3	0	ATAATTTT	0.2292	0.22146
POU2F1 [T01031]	2047	2054	4	0	ATGGAAAT	0.2292	0.22127
POU1F1a [T00691]	2092	2096	1	0	TAAAT	9.7793	9.56788
POU1F1a [T00691]	2138	2142	1	0	TGAAT	9.7793	9.56788
POU1F1a [T00691]	2194	2198	1	0	TGAAT	9.7793	9.56788
POU1F1a [T00691]	2231	2235	1	0	TGAAT	9.7793	9.56788
POU1F1a [T00691]	2404	2408	1	0	TAAAT	9.7793	9.56788
POU2F1 [T00643]	2471	2476	4	0	AATGAG	3.66724	3.5862
POU1F1a [T00691]	2550	2554	1	0	TAAAT	9.7793	9.56788
POU2F1 [T00643]	2732	2737	4	0	AATTAG	3.66724	3.5862
POU1F1a [T00691]	2909	2913	1	0	TGAAT	9.7793	9.56788
POU1F1a [T00691]	3025	3029	1	0	ATTTA	9.7793	9.56788
POU1F1a [T00691]	3033	3037	1	0	TAAAT	9.7793	9.56788
POU1F1a [T00691]	3564	3568	1	0	ATTCA	9.7793	9.56788
POU1F1b [T01516]	3669	3676	2	0	AAAATTAT	0.2292	0.22146
POU1F1c [T01902]	3669	3676	3	0	AAAATTAT	0.2292	0.22146
POU2F1 [T00643]	3747	3752	4	0	AATTAG	3.66724	3.5862
POU2F1 [T01031]	3951	3958	4	0	ATTTGCAT	0.2292	0.22127
POU2F2B [T00662]	3951	3958	5	0	ATTTGCAT	0.0764	0.0728
POU2F2B [T01871]	3951	3958	5	0	ATTTGCAT	0.0764	0.0728
POU1F1a [T00691]	4173	4177	1	0	TAAAT	9.7793	9.56788
POU1F1a [T00691]	4387	4391	1	0	ATTCA	9.7793	9.56788
POU1F1a [T00691]	4729	4733	1	0	ATTTA	9.7793	9.56788
POU1F1a [T00691]	4743	4747	1	0	ATTCA	9.7793	9.56788
POU1F1a [T00691]	4749	4753	1	0	TAAAT	9.7793	9.56788
