# Supplementary material for: Genome-wide association analysis reveal the genetic reasons affect melanin spot accumulation in beak skin of ducks
Source: Research Square preprint supplement (doi:10.21203/rs.3.rs-608516/v1), 2021-06-25
Supplement: Supplementary file 3 [file d3ce8313b4f1aad0c2c97d92.xlsx]

## Sheet: Sheet1
CHR	BP	REF	ALT	-Log10(P)	R2	Type and locations	Gene
13	4890872	A	G	8.3777	0.349673	intron_variant	LOC110351250
13	4890876	A	G	8.39428	0.325181	intron_variant	LOC110351250
13	4930452	T	C	8.98509	0.192669	intergenic_region	LOC110351250-LOC101799721
13	4930459	A	G	9.00054	0.192532	intergenic_region	LOC110351250-LOC101799721
13	4930995	T	A	8.3175	0.193327	intergenic_region	LOC110351250-LOC101799721
13	4950561	C	T	8.17037	0.825318	intergenic_region	LOC110351250-LOC101799721
13	4996674	C	G	9.09444	0.445505	synonymous_variant	LOC101799721
13	5019110	A	T	9.54276	0.972838	intron_variant	MITF
13	5019135	A	G	10.3116	1	intron_variant	MITF
13	5022262	C	T	9.61666	0.268731	intron_variant	MITF
13	5022271	C	G	9.59225	0.774085	intron_variant	MITF
13	5034102	A	C	8.62408	0.598435	intron_variant	MITF
13	5034423	T	C	8.77096	0.684921	intron_variant	MITF
13	5034443	C	T	8.93172	0.722881	intron_variant	MITF
13	5035485	C	A	8.2341	0.800401	intron_variant	MITF
13	5035490	C	T	8.2501	0.794108	intron_variant	MITF
13	5039271	A	G	8.92494	0.777199	intron_variant	MITF
13	5040312	G	A	9.72941	0.483135	intron_variant	MITF
13	5042260	T	A	8.37802	0.767606	intron_variant	MITF
13	5043249	A	C	8.57168	0.765338	intron_variant	MITF
13	5060499	A	G	8.88293	0.468797	intron_variant	MITF
13	5060504	G	C	8.43981	0.531918	intron_variant	MITF
13	5061651	C	T	10.0383	0.462894	intron_variant	MITF
13	5066458	A	G	8.93868	0.471275	intron_variant	MITF
13	5249842	G	T	9.54402	0.167298	intron_variant	FRMD4B
13	5251406	T	C	8.17359	0.223389	intron_variant	FRMD4B
13	5257216	C	T	8.18183	0.28357	downstream_gene_variant	FRMD4B
13	5303911	C	G	8.51407	0.287928	downstream_gene_variant	UBA3
13	5368132	A	T	9.32135	0.292534	upstream_gene_variant	FAM19A4
13	5377420	T	G	8.28667	0.478396	intron_variant	FAM19A4
13	5380371	T	A	8.17935	0.372585	intron_variant	FAM19A4
13	5383205	C	T	8.77546	0.599906	intron_variant	FAM19A4
13	5383211	A	G	8.86881	0.604966	intron_variant	FAM19A4
13	5388732	T	C	9.71693	0.364183	intron_variant	FAM19A4
13	5392161	C	T	8.41834	0.53824	intron_variant	FAM19A4
13	5396324	C	T	9.97561	0.510937	intron_variant	FAM19A4
13	5397681	C	T	9.67864	0.3424	intron_variant	FAM19A4
13	5404360	C	T	8.41966	0.232839	intron_variant	FAM19A4
13	5404362	G	A	8.41966	0.302179	intron_variant	FAM19A4
13	5409938	T	G	9.17938	0.354246	intron_variant	FAM19A4
13	5409947	A	G	9.21381	0.379602	intron_variant	FAM19A4
13	5500966	C	T	8.52734	0.498979	intron_variant	FAM19A1
13	5503699	C	T	9.84069	0.427984	intron_variant	FAM19A1
13	5512696	T	A	8.70492	0.318579	intron_variant	FAM19A1
13	5844029	A	G	8.20382	0.481154	intron_variant	SUCLG2
13	5924462	C	G	9.8273	0.454419	downstream_gene_variant	SUCLG2
