# Supplementary material for: Genome-wide association analysis reveal the genetic reasons affect melanin spot accumulation in beak skin of ducks
Source: Research Square preprint supplement (doi:10.21203/rs.3.rs-608516/v1), 2021-06-25
Supplement: Supplementary file 5 [file f0f82a9cb77a107b7cb7876c.xlsx]

## Sheet: Sheet1
CHR	BP	REF	ALT	-Log10(P)	R2	Type and locations	Gene
25	3353350	C	T	9.06966	0.25537	upstream_gene_variant	LOC106015506
25	3397598	A	G	9.00261	0.17505	intron_variant	LOC106015505
25	3397632	A	G	8.64792	0.165017	intron_variant	LOC106015505
25	3455935	G	C	10.0792	0.529192	upstream_gene_variant	SIK2
25	3537199	T	A	9.36614	0.260346	upstream_gene_variant	BTG4
25	3632534	A	G	9.79523	0.200956	intron_variant	POU2AF1
25	3633290	C	T	8.21296	0.238799	intron_variant	POU2AF1
25	3831255	A	G	8.64215	0.388296	downstream_gene_variant	LOC106019722
25	3839209	G	A	8.3087	0.378924	intergenic_region	LOC106019722-NECTIN1
25	3864851	G	A	8.45602	0.3349	upstream_gene_variant	NECTIN1
25	3870656	C	G	9.00904	0.340582	intron_variant	NECTIN1
25	3953308	G	A	8.27412	0.426942	intergenic_region	LOC106018229-LOC110353386
25	3983163	T	C	10.7925	0.55749	intron_variant	LOC110353386
25	3986370	A	G	9.17337	0.455087	intron_variant	LOC110353386
25	3993840	G	A	10.4543	0.460349	intron_variant	LOC110353386
25	4045339	G	A	8.7092	0.590667	intron_variant	LOC110353386
25	4046513	T	C	9.04855	0.365785	intron_variant	LOC110353386
25	4103713	A	C	8.56707	0.413905	upstream_gene_variant	TRIM29
25	4158872	T	G	8.57617	0.457189	upstream_gene_variant	OAF
25	4208306	T	C	9.07308	0.365181	downstream_gene_variant	POU2F3
25	4208317	A	G	11.0862	0.396261	downstream_gene_variant	POU2F3
25	4270063	A	C	12.1293	0.438322	intron_variant	ARHGEF12
25	4286765	G	A	12.9809	1	splice_region_variant&intron_variant	ARHGEF12
25	4424228	C	T	9.5963	0.196033	upstream_gene_variant	GRIK4
25	4465887	G	A	8.87487	0.596874	intron_variant	GRIK4
